# Supplementary material
Source: publisher figshare collection journal article supplement (https://future-science-group.figshare.com/ndownloader/files/29092602)
Supplement: Supplementary file 1 [file 29092602]

Supplemental Table 1 Selection of hidden layer presentation nodes of BiDNNs and multimodal autoencoder

| Nodes | BiDNNs | | | Multimodal autoencoder | | |
| --- | --- | --- | --- | --- | --- | --- |
| C-index | Brier score | log-rank-p | C-index | Brier score | log-rank-p |
| 100 | 0.6243 | 0.1990 | 5.52E-02 | - | - | - |
| 200 | 0.6330 | 0.2042 | 8.16E-02 | 0.5355 | 0.1996 | 8.78E-01 |
| 300 | 0.6685 | 0.2016 | 5.61E-03 | 0.5561 | 0.1995 | 5.10E-01 |
| 400 | 0.6792 | 0.2005 | 1.98E-03 | 0.7123 | 0.2033 | 2.93E-03 |
| 500 | 0.7298 | 0.1899 | 9.61E-06 | 0.5568 | 0.2002 | 2.85E-01 |
| 600 | 0.7157 | 0.2007 | 6.81E-05 | 0.6323 | 0.1980 | 5.34E-03 |
| 700 | 0.7282 | 0.1885 | 1.39E-05 | 0.6400 | 0.2062 | 2.18E-02 |
| 800 | 0.6951 | 0.2009 | 2.71E-04 | 0.6222 | 0.2085 | 3.27E-02 |
| **900** | 0.7530 | 0.1941 | 3.78E-06 | 0.6393 | 0.2044 | 3.38E-03 |
| 1000 | 0.7471 | 0.1965 | 4.29E-06 | 0.7416 | 0.1983 | 2.34E-05 |
